# Supplementary material for: Species-Specific Inactivation of Triosephosphate Isomerase from Trypanosoma brucei: Kinetic and Molecular Dynamics Studies
Source: MDPI journal article supplement (doi:10.3390/molecules22122055), 2017-11-24
Supplement: s1 [file s1]

Supplementary Material

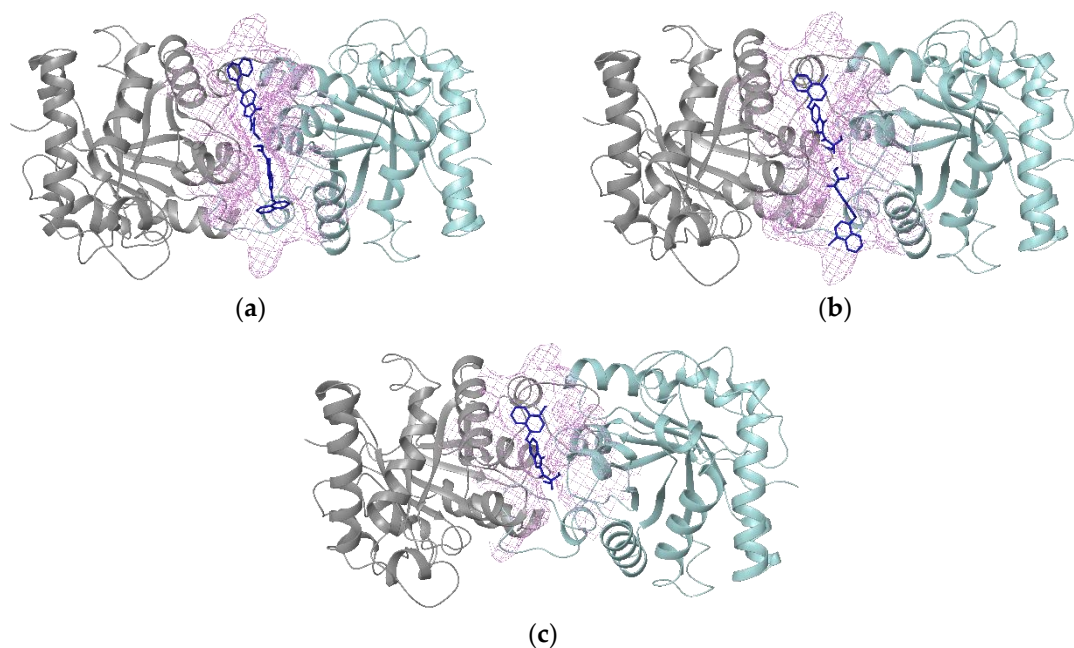

**Figure S1.** Complete view of the binding mode of compounds (a) 1, (b) 2, and (c) 3, at the dimer interface of TbTIM predicted by docking. For compounds 1 and 2 the two molecules are displayed. Molecular surface is drawn as a purple grid.

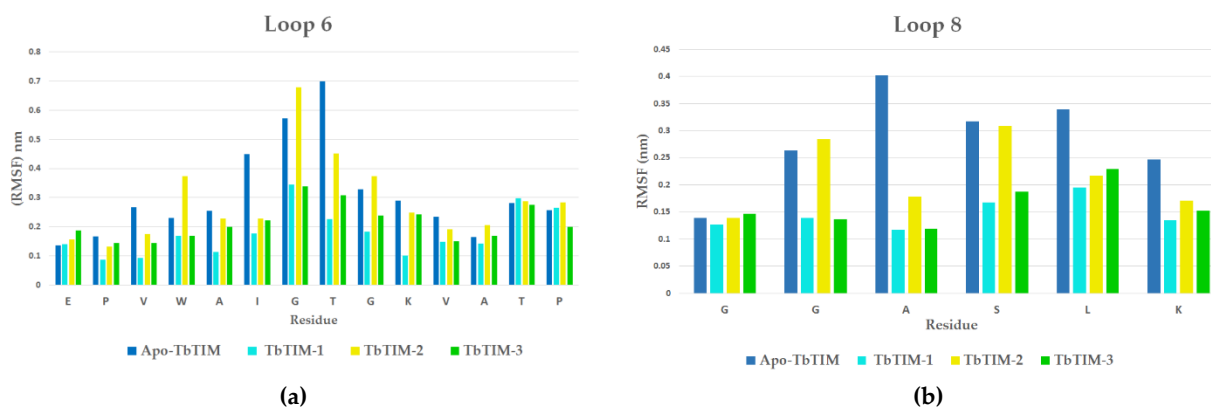

**Figure S2.** RMSF comparison between Apo-TbTIM and the complexes with compounds 1, 2 and 3. (a) Loop 6 residues. (b) Loop 8 residues.
